# Supplementary material for: Historia del urbanismo en España: Vol. I. Del Eneolítico a la Baja Edad Media,
Source: Royal Society of Chemistry journal article supplement (doi:10.1039/d4sm00871e), 1996-01-01
Supplement: d4sm00871e1.pdf [file d4sm00871e1.pdf]

Supporting information for  
“Co-assembly of Cellulose Nanocrystals and Gold Nanorods: Insights from Molecular  
Dynamics Modelling”

Jiaxin Hou, William Sampson, and Ahu Gümrah Dumanli  
*Department of Materials, The University of Manchester, Oxford Rd, Manchester, M13 9PL, UK*  
*Henry Royce Institute, The University of Manchester, Oxford Rd, Manchester, M13 9PL, UK*

SUPPLEMENTARY FIGURES

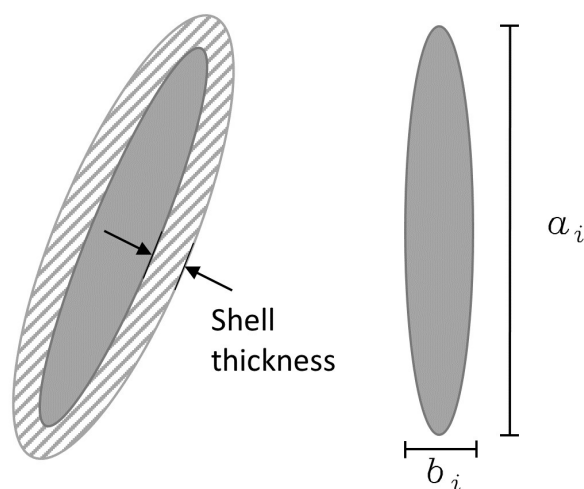

Fig. S1. Core-Shell contact model. The solid grey-shaded ellipse represents a CNC particle, and the dashed area represents the shell thickness, such that ellipses are assumed to be in mutual contact when a grey region intersects the dashed shell

TABLE I. Well depth parameters for side-side and tip-tip interactions between CNCs and AuNRs.

|                | $\epsilon$ (kJ/mol) |
|----------------|---------------------|
| CNC side-side  | 55.48               |
| CNC tip-tip    | 4.75                |
| AuNR side-side | 45.21               |
| AuNR tip-tip   | 4.33                |

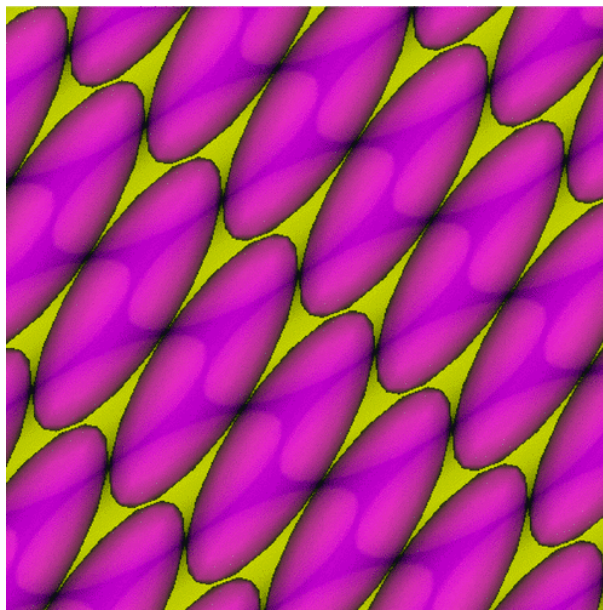

Fig. S2. The layers of the densest known packing of ellipsoids with maximal aspect ratio of 3[1].

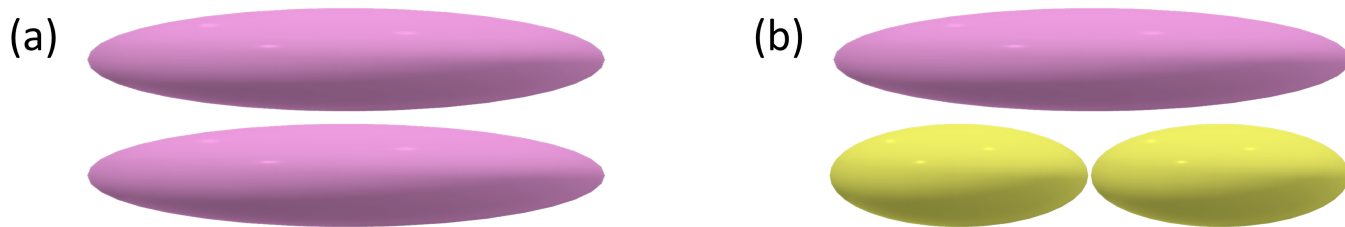

Fig. S3. Packing in homogeneous (a) and heterogeneous (b) systems. The ratio of long axis of two particles is 2:1. In a homogeneous system (a), each particle contribute same value of 1 to kissing number; in heterogeneous system (b), the short particle only contribute 0.5 to the kissing number value of long particle, whereas the long particle contribute 2 to that of the short ellipsoid.

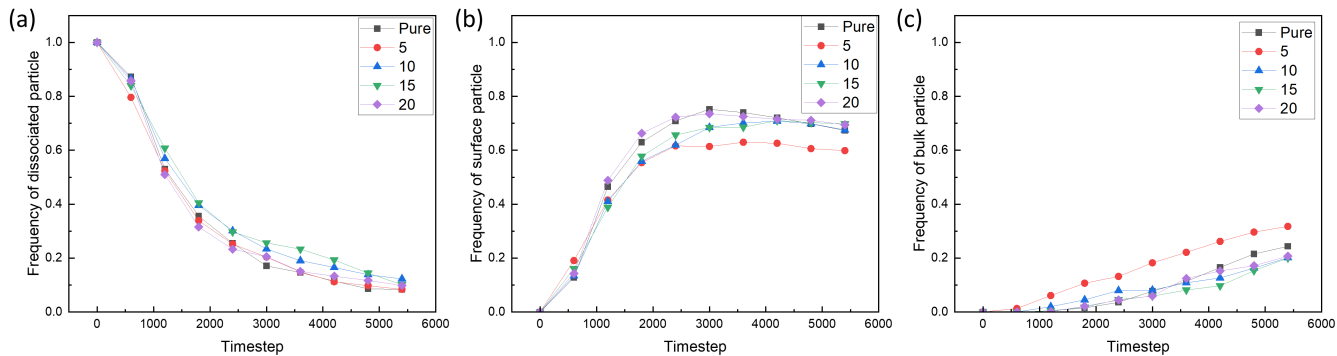

Fig. S4. Projction representation of dissociated, surface and bulk particles. Each group shows a same trend during self-assembly.

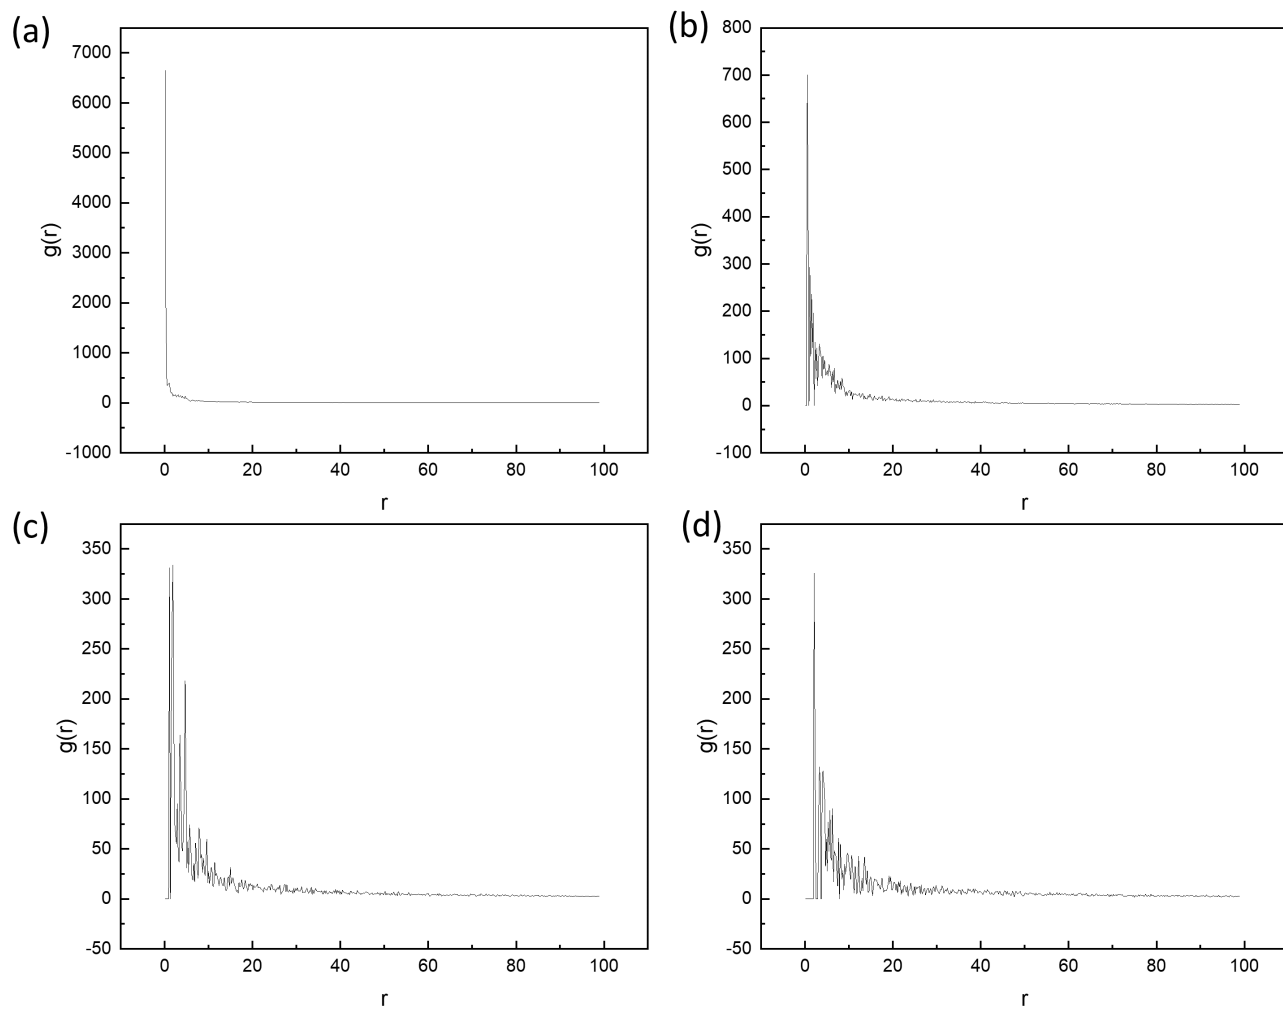

Fig. S5. Radial distribution function for AuNRs with AR of 2.5, 5, 7.5 and 10.

**REFERENCES**

---

- [1] A. Donev, F. H. Stillinger, P. Chaikin, and S. Torquato, Physical review letters **92**, 255506 (2004).
